# Supplementary material
Source: publisher figshare collection journal article supplement (https://tandf.figshare.com/ndownloader/files/15576533)
Supplement: Supplementary file 1 [file 15576533]

library(doMC)
library(foreach)
library(MASS)
library(Matrix)
library(optparse)
library(parallel)
library(psych)

# Change the number of CPU cores to maximum 
registerDoMC(detectCores())

###############################
##### CFA (the proposal) ######
###############################
CFA.EM <- function(lambda, 
                   psi,
                   omega,
                   rho, 
                   x,
                   alpha0 = 0,
                   gap = 1e-3,
                   max.iter = 5 * 1e4,
                   thresh.GL = 1e-5,
                   thresh.SGL = 1e-5,
                   weight.GL,
                   weight.SGL){
  
  # Inner function calculating trace 
  tr <- function(x){return(sum(diag(x)))}
  
  # Force conversion to matrix
  lambda <- as.matrix(lambda); psi <- as.matrix(psi); omega <- as.matrix(omega)
  
  # Sample covariance
  s <- cov(t(x))
  
  # k is the number of factors
  k <- ncol(lambda)
  n <- ncol(x)
  p <- nrow(x)
  mu <- matrix(rep(apply(x, 1, mean), n), ncol = ncol(x)) 
  
  # First EL
  sigma <- lambda %*% omega %*% t(lambda) + psi
  b <- t(omega) %*% t(lambda) %*% solve(sigma)
  EF <- b %*% (x - mu)
  B <- omega - b %*% lambda %*% omega
  EFF <- as.matrix((n - 1) * (B + b %*% s %*% t(b)))
  EL <- - (n * (p + k) / 2 * log(2 * pi) + n / 2 * log(det(psi)) +
             1 / 2 * tr(solve(omega) %*% EFF) + n / 2 * log(det(omega)) + 
             1 / 2 * tr(solve(psi) %*% (x - mu) %*% t(x - mu)) - 
             1 * tr(solve(psi) %*% (x - mu) %*% t(EF) %*% t(lambda)) +
             1 / 2 * tr(solve(psi) %*% lambda %*% EFF %*% t(lambda)) + 
             n * rho * (1 - alpha0) * sum(weight.GL * sqrt(apply(lambda^2, FUN = sum, MARGIN = 1))) + 
             n * rho * alpha0 * sum(weight.SGL * abs(lambda))
  ) - 1
  
  # First EL.prev
  EL.prev <- EL - 1
  
  counter <- 0
  
  # Synthetic stopping criteria:
  # 1. Either the gap between adjacent elements falls below a certain threshold
  # 2. Or the number of iterations reaches 1e5
  while(abs(EL.prev - EL) > gap && counter < max.iter){
    
    counter <- counter + 1
    
    # Update EF, whose i-th column is E(f_i | x_i)
    sigma <- lambda %*% omega %*% t(lambda) + psi
    b <- t(omega) %*% t(lambda) %*% solve(sigma)
    EF <- b %*% (x - mu)
    
    # Update EFF = sum_{i = 1}^n E(f_nf_n^T | x_n)
    B <- omega - b %*% lambda %*% omega
    
    EFF <- as.matrix((n-1) * (B + b %*% s %*% t(b)))
    
    # Save lambda to lambda.prev
    lambda.prev <- lambda
    
    # Expected log likelihood
    EL.prev <- EL
    EL <- - (n * (p + k) / 2 * log(2 * pi) + n / 2 * log(det(psi)) +
               1 / 2 * tr(solve(omega) %*% EFF) + n / 2 * log(det(omega)) + 
               1 / 2 * tr(solve(psi) %*% (x - mu) %*% t(x - mu)) - 
               1 * tr(solve(psi) %*% (x - mu) %*% t(EF) %*% t(lambda)) +
               1 / 2 * tr(solve(psi) %*% lambda %*% EFF %*% t(lambda)) + 
               n * rho * (1 - alpha0) * sum(weight.GL * sqrt(apply(lambda^2, FUN = sum, MARGIN = 1))) + 
               n * rho * alpha0 * sum(weight.SGL * abs(lambda))
    )
    
    # Update lambda row by row (p of them)
    for(i in 1:p){
      
      # If the entire row is not close to zero
      if(sqrt(sum(lambda.prev[i,]^2)) > thresh.GL){
        
        for(j in 1:k){
          
          # If each individual lambda_ij is not close to zero
          if(abs(lambda.prev[i, j]) > thresh.SGL){
            
            # Denominator
            denominator <- n * rho * (1 - alpha0) * weight.GL[i] / sqrt(sum(lambda.prev[i,]^2)) + 
              n * rho * alpha0 * weight.SGL[i, j] / abs(lambda.prev[i, j]) + 
              EFF[j, j] / psi[i, i]
            
            # Numerator
            numerator <- ((x - mu)[i,] %*% EF[j,] - lambda[i, -j] %*% EFF[-j, j]) / psi[i, i]
            
            # Update lambda_ij  
            lambda[i, j] <- numerator / denominator
          } else{
            lambda[i, j] <- 0
          }
        }
      } else{
        lambda[i,] <- rep(0, k)
      }
    }
    
    # Update psi
    psi <- diag(diag(s - 2 * s %*% t(b) %*% t(lambda) + lambda %*% B %*% t(lambda) + 
                       lambda %*% b %*% s %*% t(b) %*% t(lambda)))  
    # Update omega
    omega <- EFF / n
    
    # Rescaling diagonal to be one
    omega <- diag(1 / sqrt(diag(omega))) %*% omega %*% diag(1 / sqrt(diag(omega)))
    
    # Force positive definiteness
    omega <- as.matrix(nearPD(omega)$mat)
  }
  
  # The form of LCV is
  # LCV = 2n[-l/n+p/(2n)+p/(2n*)], where p is the number of (non-zero) parameters 
  # in the model and l is the log-likelihood function. Here n* is so-called fictional
  # sample size. When n*=n, it is equivalent to the ordinary AIC model selection 
  # criterion; when n*=log n/(n-1), it becomes the ordinary BIC.
  nonzeros <- sum(lambda != 0) + sum(psi != 0) + sum(omega[upper.tri(omega)] != 0) # + length(diag(omega))
  n_fict <- n / (log(n) - 1)
  LCV <- 2 * n * (- EL / n + nonzeros / (2 * n) + nonzeros / (2 * n_fict))
  BIC <- - 2 * EL + nonzeros * log(n)
  #with the specified n_fict above, LCV is equivalent to BIC
  return(list(lambda = lambda, psi = psi, omega = omega, LCV = LCV, BIC = BIC))  
}

#############################################
##### EFA (Hirose and Konishi's method)######
#############################################
EFA.EM <- function(lambda, 
                   psi, 
                   rho, 
                   x,
                   gap = 1e-3,
                   max.iter = 5 * 1e4,
                   thresh = 1e-5,
                   weight){
  
  # Inner function calculating trace of a matrix
  tr <- function(x){return(sum(diag(x)))}
  
  # Force conversion to matrix
  lambda <- as.matrix(lambda); psi <- as.matrix(psi)
  
  # k := # of factors
  k <- ncol(lambda)
  n <- ncol(x)
  p <- nrow(x)
  s <- cov(t(x))
  
  # Means
  mu <- matrix(rep(apply(x, 1, mean), n), ncol = ncol(x))
  
  # First expected log likelihood
  sigma <- lambda %*% t(lambda) + psi
  B <- diag(k) - t(lambda) %*% solve(sigma) %*% lambda
  EF <- t(lambda) %*% solve(sigma) %*% (x - mu)
  EFF <- n * B + EF %*% t(EF)
  EL <- - (n * (p + k) / 2 * log(2 * pi) + n / 2 * log(det(psi)) +
             1 / 2 * tr(EFF) + 
             1 / 2 * tr(solve(psi) %*% (x - mu) %*% t(x - mu)) - 
             tr(t(EF) %*% t(lambda) %*% solve(psi) %*% (x - mu)) + 
             1 / 2 * tr(t(lambda) %*% solve(psi) %*% lambda %*% EFF) + 
             n * rho * sum(weight * sqrt(apply(lambda^2, FUN = sum, MARGIN = 1)))
  ) - 1
  
  # First *previous* expected log likelihood
  EL.prev <- EL - 1
  
  # Reset counter
  counter <- 0
    while((abs(EL.prev - EL) > gap) && (counter < max.iter)){
    
    # Increment the counter
    counter <- counter + 1
    
    # Update sigma and B
    sigma <- lambda %*% t(lambda) + psi
    B <- diag(k) - t(lambda) %*% solve(sigma) %*% lambda
    
    # Update EF
    EF <- t(lambda) %*% solve(sigma) %*% (x - mu)
    
    # Update EFF
    EFF <- n * B + EF %*% t(EF)
    
    # Expected log likelihood
    EL.prev <- EL
    EL <- - (n * (p + k) / 2 * log(2 * pi) + n / 2 * log(det(psi)) +
               1 / 2 * tr(EFF) + 
               1 / 2 * tr(solve(psi) %*% (x - mu) %*% t(x - mu)) - 
               tr(t(EF) %*% t(lambda) %*% solve(psi) %*% (x - mu)) + 
               1 / 2 * tr(t(lambda) %*% solve(psi) %*% lambda %*% EFF) + 
               n * rho * sum(weight * sqrt(apply(lambda^2, FUN = sum, MARGIN = 1)))
    )
    
    # Store the previous lambda before doing any update
    lambda.prev <- lambda
    
    # Update lambda row by row (p of them)
    for(i in 1:p){
      
      # If the previous lambda is not close to zero
      if(sqrt(sum(lambda.prev[i,]^2)) > thresh){
        
        lambda[i,] <- solve(EFF / psi[i, i] + n * rho * weight[i] / sqrt(sum(lambda.prev[i,]^2)) * diag(k)) %*%
          t(t((x - mu)[i,]) %*% t(EF) / psi[i, i])
        
      } else{
        
        # If the previous lambda is very small, then set to zero
        lambda[i,] <- rep(0, k)
      }
    }
    
    # Update psi
    psi <- 1 / n * diag(diag((x - mu) %*% t(x - mu) - 2 * (x - mu) %*% t(EF) %*% t(lambda) + lambda %*% EFF %*% t(lambda)))  
  }
  
  # The form of LCV is
  # LCV = 2n[-l/n+p/(2n)+p/(2n*)], where p is the number of (non-zero) parameters 
  # in the model and l is the log-likelihood function. Here n* is so-called fictional
  # sample size. When n*=n, it is equivalent to the ordinary AIC model selection 
  # criterion; when n*=log n/(n-1), it becomes the ordinary BIC.
  nonzeros <- sum(lambda != 0) + sum(psi != 0)
  n_fict <- n / (log(n) - 1)
  LCV <- 2 * n * (- EL / n + nonzeros / (2 * n) + nonzeros / (2 * n_fict))
  BIC <- - 2 * EL + nonzeros * log(n)
  #with the specified n_fict above, LCV is equivalent to BIC
  
  return(list(lambda = lambda, psi = psi, LCV = LCV, BIC = BIC))  
}

#####################
#### Simulation #####
#####################
Simulation <- function(
  CORRELATION_FLAG){
  
  ################
  ##### Data #####
  ################
  # Generate sample data
  # p is the number of x-variable
  p <- 7
  
  # Sample size
  n <- 50
  
  # Number of factors
  k <- 3
  
  # Real lambda
  lambda.true <- rbind(0.8 * diag(3),
                       matrix(c(0.8, 0.8, 0,
                                0, 0.8, 0.8,
                                0, 0, 0,
                                0.8, 0.8, 0.8),
                              nrow = 4, byrow = TRUE))
  # Real psi
  psi.true <- 0.64 * diag(p)
  
  # Different factor correlation matrices omega's
  if(CORRELATION_FLAG == 1)
  {
    omega.true <- diag(k)
  } else{
    if(CORRELATION_FLAG == 2)
    {
      omega.true <- matrix(rep(0.2, k^2), nrow = k)
      omega.true[lower.tri(omega.true)] <- omega.true[upper.tri(omega.true)]
      diag(omega.true) <- rep(1, k)
    } else{
      omega.true <- matrix(rep(0.8, k^2), nrow = k)
      omega.true[lower.tri(omega.true)] <- omega.true[upper.tri(omega.true)]
      diag(omega.true) <- rep(1, k)
    }
  }
  
  # Real sigma
  sigma.true <- lambda.true %*% omega.true %*% t(lambda.true) + psi.true
  
  # Simulate 1000 times
  times <- 1000
  
  # Generate observation
  set.seed(1)
  x_all <- array(0, c(times, n, p)) 
  for(iter_x in 1:times){
    x_all[iter_x,,] <- mvrnorm(n = n, mu = rep(0, p), Sigma = sigma.true)
  }
  
  # Save the data first
  save(x_all, file = "x_all.RData")
  
  # Loop over a grid of rho's and alpha's
  rho.grid <- seq(0, 1.5, 0.02)
  alpha.grid <- seq(0, 1, by = 0.05)
  
  system.time(
    final_report <- foreach(iteration = 1:times) %dopar% {
      
      # Load data for that iteration
      x <- x_all[iteration,,]
      
      # MLE estimate for that iteration
      lambda.mle <- factanal(x, factors = 3, n.obs = n, method = "mle")$loadings
      
      # CFA weights
      c1 <- p / sum(1 / apply(lambda.mle, FUN = function(x) sqrt(sum(x^2)), 1))
      weight.GL <- c1 * 1 / apply(lambda.mle, FUN = function(x) sqrt(sum(x^2)), 1)
      c2 <- k * p / sum(1 / abs(lambda.mle))
      weight.SGL <- c2 * 1 / abs(lambda.mle)
      
      # Weighted CFA
      results.CFA <- array(NA, c(length(rho.grid), length(alpha.grid), dim(lambda.true)))
      LCV.CFA <- array(NA, c(length(rho.grid), length(alpha.grid)))
      BIC.CFA <- array(NA, c(length(rho.grid), length(alpha.grid)))
      
      for(i in 1:length(rho.grid)){
        for(j in 1:length(alpha.grid)){
          
          print(paste("iter:", iteration, ";", 
                      "method:", "CFA", ";", 
                      "rho:", rho.grid[i], ";", 
                      "alpha:", alpha.grid[j], ";", 
                      "time:", Sys.time()))
          
          result <- tryCatch({CFA.EM(lambda = lambda.mle, 
                                     psi = diag(p), 
                                     omega = diag(k), 
                                     rho = rho.grid[i], 
                                     alpha0 = alpha.grid[j],
                                     x = t(x), 
                                     weight.GL =  weight.GL,
                                     weight.SGL = weight.SGL)}, 
                             error = function(error.msg){print(error.msg); return(NA)})
          
          results.CFA[i, j,,] <- tryCatch(expr = {result$lambda}, 
                                          error = function(error.msg){return(matrix(0, dim(lambda.true)))})
          LCV.CFA[i, j] <- tryCatch(expr = {result$LCV}, error = function(error.msg){return(1e6)})
          BIC.CFA[i, j] <- tryCatch(expr = {result$BIC}, error = function(error.msg){return(1e6)})
        }
      }
      
      # Special CFA: use CFA formulation but neutralize element-level penalties
      results.CFA.sp <- array(NA, c(length(rho.grid), dim(lambda.true)))
      LCV.CFA.sp <- rep(NA, length(rho.grid))
      BIC.CFA.sp <- rep(NA, length(rho.grid))
      
      for(i in 1:length(rho.grid)){
        print(paste("iter:", iteration, ";", 
                    "method:", "Special CFA", ";", 
                    "rho:", rho.grid[i], ";", 
                    "time:", Sys.time()))
        
        result <- tryCatch({CFA.EM(lambda = lambda.mle, 
                                   psi = diag(p), 
                                   omega = diag(k), 
                                   rho = rho.grid[i], 
                                   alpha0 = 0.0,
                                   x = t(x), 
                                   weight.GL =  weight.GL,
                                   weight.SGL = weight.SGL)}, 
                           error = function(error.msg){print(error.msg); return(NA)})
        
        results.CFA.sp[i,,] <- tryCatch(expr = {result$lambda}, 
                                        error = function(error.msg){return(matrix(0, dim(lambda.true)))})
        LCV.CFA.sp[i] <- tryCatch(expr = {result$LCV}, error = function(error.msg){return(1e6)})
        BIC.CFA.sp[i] <- tryCatch(expr = {result$BIC}, error = function(error.msg){return(1e6)})
      }
      
      # EFA
      results.EFA <- array(NA, c(length(rho.grid), dim(lambda.true)))
      LCV.EFA <- rep(NA, length(rho.grid))
      BIC.EFA <- rep(NA, length(rho.grid))
      
      for(i in 1:length(rho.grid)){
        
        print(paste("iter:", iteration, ";", 
                    "method:", "EFA", ";", 
                    "rho:", rho.grid[i], ";", 
                    "time:", Sys.time()))
        
        result <- tryCatch({EFA.EM(lambda = lambda.mle, 
                                   psi = diag(p), 
                                   rho = rho.grid[i],
                                   x = t(x), 
                                   weight = weight.GL,
                                   thresh = 1e-5)},
                           error = function(error.msg){print(error.msg); return(NA)})
        
        results.EFA[i,,] <- tryCatch(expr = {result$lambda}, 
                                     error = function(error.msg){return(matrix(0, dim(lambda.true)))})
        LCV.EFA[i] <- tryCatch(expr = {result$LCV}, error = function(error.msg){return(1e6)})
        BIC.EFA[i] <- tryCatch(expr = {result$BIC}, error = function(error.msg){return(1e6)})
      }
      
      # Return as a list
      list(lambda.mle = lambda.mle,
           
           # CFA
           results.CFA = results.CFA, 
           LCV.CFA = LCV.CFA,
           BIC.CFA = BIC.CFA,
           
           # Special CFA
           results.CFA.sp = results.CFA.sp,
           LCV.CFA.sp = LCV.CFA.sp,
           BIC.CFA.sp = BIC.CFA.sp,
           
           # EFA       
           results.EFA = results.EFA,
           LCV.EFA = LCV.EFA,
           BIC.EFA = BIC.EFA)
    }
  )
  
  # Save everything
  file_name <- sprintf(fmt = "results_%s.RData", CORRELATION_FLAG)
  save.image(file_name)  
}

Real <- function()
{
  
  # Generate data from complete cases
  data("iqitems")
  x <- iqitems
  x <- x[complete.cases(x),]
  
  # Number of observable variables
  p <- dim(x)[2]
  
  # Sample size
  n <- dim(x)[1]
  
  # Number of factors
  k <- 4
  
  # MLE estimate for that iteration
  lambda.mle <- factanal(x, factors = k, n.obs = n, method = "mle")$loadings
  
  # CFA weights
  c1 <- p / sum(1 / apply(lambda.mle, FUN = function(x) sqrt(sum(x^2)), 1))
  weight.GL <- c1 * 1 / apply(lambda.mle, FUN = function(x) sqrt(sum(x^2)), 1)
  c2 <- k * p / sum(1 / abs(lambda.mle))
  weight.SGL <- c2 * 1 / abs(lambda.mle)
  
  # Loop over a grid of rho's and alpha's
  rho.grid <- seq(0, 1, 0.01)
  alpha.grid <- seq(0, 1, by = 0.05)
  total.grid <- expand.grid(rho.grid, alpha.grid)
  
  system.time(
    CFA_report <- foreach(iteration = 1:nrow(total.grid)) %dopar% {
      
      rho <- total.grid[iteration, 1]
      alpha <- total.grid[iteration, 2]
      
      # Weighted CFA
      print(paste("Part I |",
                  "iter:",   iteration, "|", 
                  "method:", "CFA",     "|", 
                  "rho:",    rho,       "|", 
                  "alpha:",  alpha,     "|", 
                  "time:",   Sys.time()))
      
      result <- tryCatch({CFA.EM(lambda = lambda.mle, 
                                 psi = diag(p), 
                                 omega = diag(k), 
                                 rho = rho,  
                                 alpha0 = alpha, 
                                 x = t(x), 
                                 weight.GL = weight.GL,
                                 weight.SGL = weight.SGL)}, 
                         error = function(error.msg){print(error.msg); return(NA)})
      list(rho = rho, alpha = alpha, result = result)
    }
  )
  
  system.time(
    EFA_report <- foreach(iteration = 1:length(rho.grid)) %dopar% {
      
      rho <- rho.grid[iteration]
      
      # EFA
      print(paste("Part II |",
                  "iter:",   iteration, "|", 
                  "method:", "EFA",     "|", 
                  "rho:",    rho,       "|", 
                  "time:",   Sys.time()))
      
      result <- tryCatch({EFA.EM(lambda = lambda.mle, 
                                 psi = diag(p), 
                                 rho = rho,
                                 x = t(x), 
                                 weight = weight.GL,
                                 thresh = 1e-5)}, 
                         error = function(error.msg){print(error.msg); return(NA)})
      list(rho = rho, result = result)
    }
  )
  
  # Save everything: final_report
  save.image("results.RData")
}

# Cmd args:
# (1) MODE: can be "simulation" or "real", case insensitive. 
# (2) CORRELATION_FLAG: can be 1, 2, or 3, corresponding to 
# no correlation, low correlation and high correlations respectively. 
option_list <- list(
  make_option(c("--MODE"), type = "character", default = "SIMULATION", 
              help = "SIMULATION or REAL", metavar = "character"),
  make_option(c("--CORRELATION_FLAG"), type = "double", default = 1.0, 
              help = "Correlation: 1 or 2 or 3", metavar = "double")
)

# Parse the args
opt_parser <- OptionParser(option_list = option_list)
opt <- parse_args(opt_parser)
MODE <- toupper(opt$MODE)
CORRELATION_FLAG <- opt$CORRELATION_FLAG

# Kick off numerical simulation or real data fitting
if(MODE == "SIMULATION"){
  Simulation(CORRELATION_FLAG)  
} else{
  if(MODE == "REAL"){
    Real()    
  }
}
